# Supplementary material
Source: Research Square preprint supplement (doi:10.21203/rs.3.rs-9583059/v1)
Supplement: Supplementary file 1 [file 73f439888406b41e2dcbc346.docx]

**Web Appendix 1: State grouping by Socio-demographic Index (SDI): low, middle, and high**

| **Low SDI states** | **Middle SDI states** | **High SDI states** |
| --- | --- | --- |
| Assam | Andhra Pradesh | Delhi |
| Bihar | Arunachal Pradesh | Goa |
| Chhattisgarh | Gujarat | Himachal Pradesh |
| Jharkhand | Haryana | Kerala |
| Madhya Pradesh | Jammu & Kashmir | Maharashtra |
| Odisha | Karnataka | Mizoram |
| Rajasthan | Manipur | Nagaland |
| Uttar Pradesh | Meghalaya | Punjab |
|  | Tripura | Sikkim |
|  | West Bengal | Tamil Nadu |
|  |  | Union Territories (UTs) other than Delhi |
|  |  | Uttarakhand |

**Web Appendix 2: Total crude suicide rates with 95% CI: India (2013-2023)**

| State | 2013 | 2014 | 2015 | 2016 | 2017 | 2018 | 2019 | 2020 | 2021 | 2022 | 2023 |
| --- | --- | --- | --- | --- | --- | --- | --- | --- | --- | --- | --- |
| INDIA | **10.84 (10.79-10.9)** | **10.46 (10.4-10.51)** | **10.48 (10.42-10.54)** | **10.15 (10.09-10.2)** | **9.95 (9.9-10.01)** | **10.2 (10.14-10.25)** | **10.43 (10.38-10.49)** | **11.36 (11.3-11.41)** | **12.04 (11.99-12.1)** | **12.44 (12.38-12.5)** | **12.36 (12.3-12.42)** |
| Andhra Pradesh | 17 (16.73-17.28) | 18.17 (17.88-18.45) | 18.77 (18.48-19.06) | 17.16 (16.89-17.44) | 14.68 (14.43-14.93) | 14.8 (14.55-15.06) | 15.8 (15.54-16.07) | 16.78 (16.51-17.05) | 20.14 (19.85-20.44) | 20.78 (20.48-21.08) | 21.11 (20.81-21.41) |
| Arunachal Pradesh | 16.19 (14.16-18.43) | 10.91 (9.27-12.77) | 9.34 (7.83-11.06) | 8.29 (6.88-9.9) | 6.03 (4.84-7.43) | 8.86 (7.41-10.51) | 7.44 (6.13-8.96) | 10.53 (8.96-12.29) | 10.43 (8.87-12.17) | 9.62 (8.14-11.3) | 8.19 (6.83-9.74) |
| Assam | 11.1 (10.74-11.47) | 10.95 (10.59-11.31) | 9.85 (9.52-10.2) | 9.11 (8.79-9.44) | 6.78 (6.5-7.06) | 7.01 (6.73-7.3) | 6.91 (6.63-7.19) | 9.35 (9.03-9.68) | 9.3 (8.99-9.63) | 9.38 (9.06-9.7) | 8.54 (8.24-8.85) |
| Bihar | 0.97 (0.91-1.03) | 0.65 (0.6-0.7) | 0.46 (0.42-0.5) | 0.35 (0.32-0.39) | 0.33 (0.3-0.36) | 0.37 (0.34-0.41) | 0.53 (0.49-0.57) | 0.66 (0.62-0.71) | 0.67 (0.62-0.71) | 0.56 (0.52-0.6) | 0.73 (0.68-0.77) |
| Chhattisgarh | 20.62 (20.08-21.18) | 21.23 (20.68-21.79) | 26.2 (25.59-26.81) | 24.31 (23.74-24.9) | 22.57 (22.02-23.14) | 24.86 (24.28-25.44) | 26.55 (25.96-27.16) | 26.48 (25.89-27.08) | 26.54 (25.95-27.13) | 28.3 (27.7-28.91) | 26.07 (25.49-26.65) |
| Delhi | 11.73 (11.23-12.25) | 11.69 (11.19-12.2) | 10.08 (9.62-10.55) | 11.53 (11.05-12.03) | 12.91 (12.41-13.44) | 12.99 (12.49-13.51) | 12.74 (12.25-13.25) | 15.55 (15.02-16.11) | 13.8 (13.3-14.32) | 16.29 (15.75-16.85) | 14.65 (14.14-15.18) |
| Goa | 22.16 (19.82-24.69) | 19.51 (17.33-21.89) | 20.11 (17.91-22.52) | 18.05 (15.97-20.32) | 17.94 (15.88-20.2) | 16.72 (14.73-18.89) | 16.81 (14.83-18.99) | 19.88 (17.72-22.23) | 20.59 (18.39-22.97) | 19.27 (17.15-21.57) | 20.76 (18.57-23.13) |
| Gujarat | 11.49 (11.23-11.76) | 11.41 (11.15-11.68) | 11.28 (11.02-11.54) | 11.87 (11.6-12.13) | 11.22 (10.97-11.48) | 11.62 (11.37-11.89) | 11.26 (11.01-11.52) | 11.69 (11.43-11.94) | 12.59 (12.33-12.85) | 12.74 (12.48-13) | 12.51 (12.25-12.77) |
| Haryana | 12.65 (12.23-13.09) | 12.03 (11.62-12.45) | 13.11 (12.68-13.55) | 13.34 (12.92-13.78) | 12.15 (11.75-12.57) | 12.54 (12.13-12.96) | 14.61 (14.17-15.06) | 13.76 (13.33-14.19) | 12.52 (12.12-12.93) | 12.67 (12.27-13.08) | 11.12 (10.75-11.5) |
| Himachal Pradesh | 7.93 (7.28-8.62) | 9.14 (8.45-9.88) | 7.64 (7.01-8.31) | 8.96 (8.28-9.69) | 7.99 (7.35-8.67) | 10.2 (9.48-10.96) | 8 (7.36-8.67) | 11.66 (10.89-12.47) | 12.02 (11.24-12.84) | 8.66 (8-9.36) | 10.95 (10.21-11.73) |
| Jammu & Kashmir | 2.35 (2.1-2.64) | 1.99 (1.75-2.25) | 2.84 (2.56-3.15) | 2.49 (2.23-2.78) | 2.15 (1.91-2.42) | 2.46 (2.2-2.74) | 2.1 (1.86-2.36) | 2.19 (1.95-2.46) | 1.88 (1.65-2.12) | 2.43 (2.18-2.7) | 2.76 (2.49-3.05) |
| Jharkhand | 4.27 (4.06-4.5) | 3.74 (3.54-3.95) | 2.36 (2.21-2.53) | 3.6 (3.41-3.81) | 3.34 (3.15-3.53) | 3.57 (3.38-3.77) | 4.4 (4.19-4.61) | 5.65 (5.41-5.89) | 4.74 (4.52-4.96) | 5.59 (5.36-5.83) | 5.08 (4.86-5.31) |
| Karnataka | 18.06 (17.73-18.4) | 17.37 (17.05-17.7) | 16.95 (16.64-17.28) | 16.63 (16.32-16.95) | 18.09 (17.76-18.42) | 17.71 (17.38-18.03) | 17.15 (16.84-17.47) | 18.48 (18.15-18.81) | 19.53 (19.19-19.86) | 20.22 (19.88-20.56) | 19.69 (19.35-20.02) |
| Kerala | 25.52 (24.98-26.06) | 24.76 (24.23-25.29) | 22.39 (21.89-22.9) | 22.28 (21.78-22.78) | 22.64 (22.14-23.14) | 23.57 (23.06-24.08) | 24.35 (23.84-24.88) | 24.07 (23.56-24.59) | 26.9 (26.36-27.45) | 28.51 (27.96-29.07) | 30.66 (30.09-31.24) |
| Madhya Pradesh | 12.57 (12.32-12.83) | 11.84 (11.59-12.08) | 13.26 (13.01-13.52) | 13.25 (12.99-13.5) | 14.72 (14.45-14.99) | 14.52 (14.25-14.78) | 15.14 (14.88-15.41) | 17.48 (17.2-17.77) | 17.7 (17.42-17.99) | 17.98 (17.7-18.27) | 18.08 (17.8-18.37) |
| Maharashtra | 14.46 (14.24-14.68) | 14.03 (13.82-14.25) | 14.44 (14.23-14.66) | 14.48 (14.26-14.7) | 14.72 (14.5-14.93) | 14.85 (14.63-15.07) | 15.48 (15.26-15.7) | 16.14 (15.92-16.37) | 17.84 (17.61-18.08) | 18.13 (17.9-18.37) | 17.95 (17.71-18.18) |
| Manipur | 1.26 (0.89-1.74) | 1.69 (1.25-2.23) | 1.24 (0.87-1.71) | 1.22 (0.86-1.69) | 1.41 (1.02-1.9) | 1.69 (1.26-2.21) | 1.86 (1.41-2.41) | 1.4 (1.02-1.88) | 1.54 (1.14-2.04) | 0.81 (0.53-1.19) | 0.77 (0.5-1.14) |
| Meghalaya | 4.51 (3.79-5.34) | 3.23 (2.62-3.93) | 5.55 (4.75-6.45) | 5.3 (4.52-6.17) | 5.21 (4.45-6.07) | 5.92 (5.1-6.82) | 6.14 (5.31-7.05) | 6.87 (6-7.84) | 6.87 (6-7.83) | 6.41 (5.58-7.34) | 6.56 (5.72-7.49) |
| Mizoram | 8.47 (6.85-10.35) | 10.23 (8.46-12.27) | 10.74 (8.92-12.81) | 10.71 (8.91-12.77) | 7.78 (6.26-9.55) | 6.68 (5.29-8.33) | 5.87 (4.57-7.41) | 8.97 (7.35-10.82) | 8.14 (6.61-9.91) | 12.46 (10.57-14.6) | 7.91 (6.42-9.64) |
| Nagaland | 1.82 (1.28-2.52) | 0.63 (0.33-1.08) | 1.01 (0.62-1.55) | 1.62 (1.12-2.27) | 1.56 (1.07-2.19) | 1.69 (1.18-2.34) | 1.9 (1.36-2.58) | 2.21 (1.63-2.93) | 1.96 (1.41-2.64) | 2.21 (1.63-2.92) | 1.61 (1.12-2.23) |
| Odisha | 12.37 (12.04-12.71) | 9.74 (9.45-10.05) | 9.52 (9.23-9.82) | 9.05 (8.77-9.34) | 10.37 (10.07-10.68) | 10.55 (10.25-10.86) | 10.49 (10.19-10.8) | 12.64 (12.31-12.98) | 12.83 (12.5-13.17) | 13.9 (13.55-14.25) | 13.52 (13.18-13.86) |
| Punjab | 3.43 (3.22-3.65) | 3.29 (3.09-3.51) | 3.63 (3.41-3.86) | 4.94 (4.68-5.2) | 5.04 (4.78-5.3) | 5.78 (5.51-6.06) | 7.89 (7.57-8.21) | 8.69 (8.36-9.03) | 8.57 (8.24-8.9) | 7.99 (7.68-8.31) | 7.47 (7.17-7.79) |
| Rajasthan | 6.86 (6.67-7.05) | 6.19 (6.01-6.38) | 4.72 (4.57-4.88) | 4.95 (4.79-5.11) | 5.1 (4.94-5.26) | 5.68 (5.51-5.85) | 5.86 (5.69-6.03) | 7.22 (7.04-7.41) | 7.05 (6.87-7.24) | 6.66 (6.48-6.84) | 6.85 (6.67-7.03) |
| Sikkim | 29.48 (25.38-34.06) | 38.66 (33.96-43.83) | 37.83 (33.2-42.92) | 40.83 (36.05-46.08) | 32.92 (28.65-37.64) | 30.28 (26.22-34.8) | 33.13 (28.89-37.81) | 42.53 (37.74-47.77) | 39.29 (34.71-44.3) | 42.89 (38.12-48.1) | 40.34 (35.74-45.38) |
| Tamil Nadu | 22.69 (22.35-23.04) | 21.89 (21.55-22.23) | 21.28 (20.95-21.61) | 20.34 (20.01-20.66) | 19.28 (18.96-19.59) | 18.44 (18.13-18.75) | 17.82 (17.52-18.12) | 22.2 (21.86-22.53) | 24.77 (24.41-25.12) | 25.88 (25.52-26.24) | 25.34 (24.99-25.7) |
| Tripura | 25.59 (24-27.27) | 20.08 (18.68-21.56) | 19.45 (18.08-20.9) | 17.47 (16.18-18.84) | 17.68 (16.38-19.04) | 18.21 (16.9-19.59) | 18.23 (16.93-19.61) | 20.95 (19.56-22.41) | 18.93 (17.62-20.32) | 17.35 (16.1-18.67) | 15.52 (14.35-16.77) |
| Union Territories | 25.9 (24.24-27.64) | 28.04 (26.34-29.83) | 30.86 (29.1-32.71) | 24.45 (22.9-26.08) | 24.4 (22.88-26.01) | 24.09 (22.59-25.66) | 23.03 (21.58-24.54) | 20.73 (19.38-22.15) | 22.07 (20.69-23.52) | 22.14 (20.78-23.56) | 22.09 (20.75-23.49) |
| Uttar Pradesh | 2.56 (2.49-2.63) | 1.71 (1.65-1.76) | 1.83 (1.77-1.89) | 1.62 (1.57-1.68) | 2.02 (1.96-2.08) | 2.18 (2.12-2.24) | 2.42 (2.36-2.49) | 2.1 (2.04-2.16) | 2.56 (2.5-2.63) | 3.5 (3.42-3.58) | 3.88 (3.8-3.96) |
| Uttarakhand | 3.52 (3.17-3.9) | 1.97 (1.71-2.26) | 4.47 (4.07-4.89) | 1.41 (1.19-1.65) | 3.04 (2.72-3.38) | 3.82 (3.46-4.2) | 4.63 (4.24-5.04) | 8.36 (7.84-8.91) | 6.28 (5.83-6.76) | 7.06 (6.58-7.56) | 8.07 (7.56-8.61) |
| West Bengal | 14.06 (13.82-14.31) | 15.29 (15.04-15.54) | 15.48 (15.23-15.73) | 14.14 (13.9-14.38) | 12.55 (12.33-12.78) | 13.76 (13.53-14) | 13.06 (12.84-13.29) | 13.43 (13.2-13.66) | 13.75 (13.52-13.99) | 12.84 (12.62-13.07) | 12.93 (12.71-13.16) |

**Web Appendix 3: Male crude suicide rates with 95% CI: India (2013-2023)**

| State | 2013 | 2014 | 2015 | 2016 | 2017 | 2018 | 2019 | 2020 | 2021 | 2022 | 2023 |
| --- | --- | --- | --- | --- | --- | --- | --- | --- | --- | --- | --- |
| INDIA | **14.16 (14.07-14.25)** | **13.76 (13.67-13.85)** | **13.96 (13.87-14.05)** | **13.41 (13.32-13.5)** | **13.27 (13.18-13.36)** | **13.59 (13.5-13.68)** | **14.25 (14.16-14.34)** | **15.68 (15.59-15.78)** | **17.02 (16.92-17.11)** | **17.4 (17.3-17.5)** | **17.53 (17.44-17.63)** |
| Andhra Pradesh | 22.98 (22.53-23.43) | 25.08 (24.61-25.55) | 26.56 (26.08-27.04) | 23.63 (23.17-24.08) | 20.54 (20.12-20.96) | 20.99 (20.57-21.42) | 23.08 (22.63-23.52) | 24.49 (24.03-24.95) | 30.86 (30.36-31.38) | 31.9 (31.38-32.42) | 32.7 (32.18-33.23) |
| Arunachal Pradesh | 23.45 (20.07-27.24) | 14.92 (12.26-17.98) | 11.96 (9.6-14.72) | 10.37 (8.19-12.94) | 7.77 (5.91-10.02) | 12.51 (10.13-15.28) | 10.46 (8.31-13) | 14.34 (11.8-17.25) | 14.06 (11.57-16.94) | 14.32 (11.81-17.2) | 9.83 (7.78-12.26) |
| Assam | 15.66 (15.06-16.28) | 15.18 (14.6-15.79) | 14.13 (13.57-14.72) | 11.97 (11.46-12.51) | 9.28 (8.82-9.74) | 9.69 (9.23-10.17) | 9.6 (9.15-10.08) | 13.23 (12.7-13.78) | 13.17 (12.64-13.71) | 12.82 (12.3-13.35) | 10.96 (10.49-11.46) |
| Bihar | 1.11 (1.03-1.2) | 0.73 (0.66-0.8) | 0.49 (0.44-0.55) | 0.34 (0.29-0.39) | 0.32 (0.28-0.37) | 0.42 (0.37-0.47) | 0.63 (0.57-0.7) | 0.71 (0.65-0.78) | 0.73 (0.66-0.8) | 0.59 (0.53-0.65) | 0.77 (0.7-0.84) |
| Chhattisgarh | 27.56 (26.68-28.47) | 28.01 (27.12-28.92) | 36.48 (35.47-37.51) | 33.12 (32.16-34.09) | 31.49 (30.56-32.43) | 35.01 (34.05-36) | 38.3 (37.3-39.33) | 37.44 (36.46-38.45) | 38.02 (37.03-39.02) | 41.15 (40.13-42.2) | 37.82 (36.84-38.81) |
| Delhi | 15.09 (14.32-15.9) | 14.85 (14.09-15.65) | 12.23 (11.55-12.95) | 14.83 (14.09-15.61) | 16.64 (15.86-17.45) | 17.15 (16.36-17.96) | 16.63 (15.86-17.42) | 20.87 (20.01-21.75) | 19.09 (18.28-19.92) | 22.91 (22.03-23.81) | 20.19 (19.37-21.03) |
| Goa | 30.7 (26.86-34.94) | 26.92 (23.34-30.89) | 28.98 (25.28-33.07) | 26.57 (23.04-30.48) | 24.83 (21.43-28.62) | 25.22 (21.8-29.02) | 25.86 (22.41-29.7) | 29.92 (26.21-34.01) | 31.67 (27.86-35.86) | 29.36 (25.7-33.39) | 31.39 (27.62-35.55) |
| Gujarat | 13.93 (13.53-14.34) | 13.93 (13.53-14.34) | 14.01 (13.62-14.42) | 14.81 (14.41-15.23) | 13.98 (13.59-14.38) | 14.85 (14.44-15.25) | 14.52 (14.12-14.92) | 15.25 (14.85-15.66) | 16.93 (16.51-17.36) | 16.88 (16.46-17.3) | 16.67 (16.26-17.09) |
| Haryana | 17.95 (17.26-18.67) | 17.82 (17.13-18.53) | 19.51 (18.8-20.25) | 19.92 (19.2-20.66) | 17.99 (17.31-18.69) | 18.54 (17.86-19.24) | 21.67 (20.94-22.43) | 20 (19.3-20.72) | 18.37 (17.7-19.05) | 19.44 (18.76-20.14) | 16.52 (15.9-17.17) |
| Himachal Pradesh | 10.27 (9.25-11.39) | 11.08 (10.02-12.23) | 9.63 (8.64-10.7) | 11.42 (10.35-12.58) | 9.19 (8.23-10.23) | 13.4 (12.24-14.64) | 10.18 (9.18-11.26) | 15.05 (13.83-16.35) | 16.37 (15.1-17.72) | 12.5 (11.39-13.68) | 14.44 (13.25-15.7) |
| Jammu & Kashmir | 2.48 (2.12-2.88) | 2.19 (1.85-2.57) | 2.93 (2.54-3.36) | 2.81 (2.43-3.24) | 2.12 (1.8-2.49) | 2.19 (1.86-2.57) | 2.21 (1.87-2.58) | 2.33 (1.99-2.71) | 2.13 (1.81-2.5) | 2.71 (2.35-3.12) | 3.15 (2.76-3.59) |
| Jharkhand | 5.62 (5.27-5.98) | 5 (4.67-5.34) | 3.13 (2.88-3.4) | 4.75 (4.44-5.08) | 4.76 (4.45-5.09) | 4.81 (4.5-5.13) | 5.56 (5.23-5.9) | 7.13 (6.76-7.51) | 6.89 (6.53-7.26) | 7.38 (7.01-7.77) | 6.63 (6.28-6.99) |
| Karnataka | 24.46 (23.92-25.01) | 24.06 (23.53-24.61) | 23.11 (22.59-23.64) | 23.45 (22.92-23.98) | 26.07 (25.52-26.63) | 25.41 (24.87-25.96) | 25.2 (24.67-25.75) | 27.32 (26.76-27.88) | 29.27 (28.7-29.85) | 30.36 (29.78-30.95) | 29.79 (29.21-30.37) |
| Kerala | 41.22 (40.24-42.22) | 39.17 (38.22-40.14) | 35.36 (34.45-36.28) | 35.76 (34.86-36.68) | 36.54 (35.63-37.47) | 37.93 (37.01-38.88) | 39.54 (38.59-40.5) | 38.75 (37.82-39.7) | 43.93 (42.94-44.93) | 46.92 (45.9-47.96) | 51.27 (50.2-52.35) |
| Madhya Pradesh | 14.59 (14.21-14.97) | 13.52 (13.16-13.89) | 15.69 (15.3-16.08) | 15.38 (15-15.76) | 17.95 (17.55-18.37) | 17.72 (17.32-18.13) | 19.09 (18.67-19.51) | 22.45 (22-22.9) | 23.39 (22.94-23.85) | 23.95 (23.49-24.41) | 24.48 (24.02-24.94) |
| Maharashtra | 19.95 (19.59-20.31) | 19.61 (19.26-19.97) | 20.75 (20.39-21.11) | 20.88 (20.52-21.25) | 21.27 (20.91-21.63) | 21.46 (21.1-21.83) | 22.78 (22.41-23.16) | 24.07 (23.7-24.46) | 27.03 (26.63-27.43) | 27.85 (27.45-28.26) | 27.86 (27.46-28.26) |
| Manipur | 1.49 (0.93-2.26) | 2.08 (1.41-2.96) | 1.4 (0.86-2.14) | 1.38 (0.85-2.11) | 1.76 (1.16-2.56) | 2.26 (1.57-3.15) | 2.3 (1.61-3.19) | 1.71 (1.12-2.49) | 2.39 (1.69-3.28) | 0.99 (0.57-1.62) | 1.05 (0.61-1.68) |
| Meghalaya | 6.29 (5.1-7.69) | 4.87 (3.83-6.1) | 8.42 (7.04-9.99) | 7.89 (6.56-9.41) | 8.12 (6.78-9.65) | 9.42 (7.98-11.05) | 10.2 (8.7-11.88) | 9.98 (8.5-11.63) | 10.43 (8.93-12.11) | 9.86 (8.41-11.49) | 10.43 (8.94-12.1) |
| Mizoram | 13.93 (11.03-17.36) | 17.45 (14.19-21.22) | 17.44 (14.2-21.19) | 17.09 (13.9-20.79) | 12.85 (10.13-16.09) | 11.24 (8.71-14.27) | 8.97 (6.73-11.7) | 14.47 (11.6-17.83) | 14.65 (11.78-18.01) | 21.8 (18.28-25.81) | 13.78 (11.02-17.02) |
| Nagaland | 2.39 (1.54-3.52) | 0.85 (0.38-1.61) | 1.49 (0.85-2.43) | 1.94 (1.2-2.97) | 2.29 (1.48-3.38) | 2.72 (1.84-3.89) | 3.24 (2.26-4.48) | 3.21 (2.24-4.44) | 3.26 (2.3-4.5) | 3.41 (2.42-4.66) | 2.43 (1.61-3.51) |
| Odisha | 15.38 (14.86-15.92) | 10.93 (10.49-11.38) | 11.14 (10.69-11.59) | 11.1 (10.66-11.56) | 10.18 (9.75-10.61) | 10.81 (10.37-11.26) | 12.16 (11.7-12.64) | 18.31 (17.74-18.9) | 20.67 (20.06-21.29) | 10.08 (9.66-10.52) | 17.15 (16.59-17.71) |
| Punjab | 4.77 (4.43-5.14) | 4.71 (4.37-5.07) | 5.36 (5-5.74) | 7.47 (7.04-7.91) | 7.46 (7.03-7.9) | 8.69 (8.23-9.16) | 11.56 (11.04-12.11) | 12.58 (12.04-13.15) | 12.7 (12.15-13.26) | 12.02 (11.49-12.57) | 10.99 (10.48-11.51) |
| Rajasthan | 9.2 (8.9-9.52) | 8.68 (8.39-8.99) | 6.71 (6.45-6.97) | 6.74 (6.48-7.01) | 7.14 (6.88-7.41) | 7.85 (7.57-8.13) | 8.29 (8.01-8.58) | 9.99 (9.68-10.3) | 9.95 (9.64-10.26) | 9.53 (9.23-9.83) | 9.85 (9.55-10.16) |
| Sikkim | 37.87 (31.52-45.13) | 48.34 (41.16-56.42) | 50.44 (43.14-58.62) | 54.11 (46.58-62.52) | 46.8 (39.85-54.61) | 41.21 (34.73-48.54) | 46.28 (39.43-53.98) | 61.29 (53.41-70.02) | 56.02 (48.52-64.34) | 62.77 (54.85-71.51) | 53.99 (46.69-62.1) |
| Tamil Nadu | 30.53 (29.97-31.1) | 29.74 (29.18-30.3) | 28.93 (28.38-29.48) | 27.39 (26.86-27.93) | 26.34 (25.82-26.86) | 24.36 (23.87-24.86) | 24.4 (23.91-24.91) | 30.52 (29.96-31.08) | 34.56 (33.97-35.15) | 37.16 (36.55-37.77) | 36.67 (36.06-37.28) |
| Tripura | 33.22 (30.69-35.91) | 25.43 (23.24-27.78) | 24.3 (22.17-26.59) | 22.99 (20.93-25.21) | 22.77 (20.73-24.97) | 24.49 (22.37-26.75) | 24.4 (22.3-26.65) | 29.04 (26.75-31.47) | 26.21 (24.06-28.52) | 24.12 (22.06-26.32) | 22.48 (20.5-24.6) |
| Union Territories | 34.54 (31.93-37.31) | 38.6 (35.87-41.48) | 43.02 (40.17-46.01) | 34.4 (31.89-37.06) | 34.24 (31.77-36.85) | 32.49 (30.13-34.99) | 30.32 (28.07-32.7) | 27.31 (25.2-29.54) | 30 (27.83-32.3) | 30.22 (28.08-32.49) | 29.9 (27.81-32.11) |
| Uttar Pradesh | 2.93 (2.83-3.03) | 1.91 (1.83-2) | 2.05 (1.97-2.14) | 1.8 (1.72-1.88) | 2.23 (2.14-2.32) | 2.49 (2.4-2.58) | 2.75 (2.66-2.85) | 2.66 (2.56-2.75) | 2.94 (2.85-3.04) | 4.29 (4.18-4.41) | 4.65 (4.53-4.77) |
| Uttarakhand | 4.62 (4.05-5.23) | 2.82 (2.38-3.3) | 6.37 (5.72-7.08) | 1.8 (1.46-2.19) | 3.77 (3.28-4.31) | 4.41 (3.88-5) | 5.87 (5.26-6.53) | 11.55 (10.69-12.46) | 7.92 (7.22-8.68) | 9.11 (8.36-9.91) | 10.07 (9.28-10.91) |
| West Bengal | 16.53 (16.16-16.9) | 18.54 (18.16-18.93) | 18.77 (18.38-19.16) | 16.01 (15.66-16.37) | 14.79 (14.45-15.14) | 15.9 (15.55-16.26) | 15.68 (15.34-16.04) | 15.99 (15.64-16.35) | 16.54 (16.19-16.9) | 15.95 (15.6-16.3) | 15.79 (15.44-16.14) |

**Web Appendix 4: Female crude suicide rates with 95% CI: India (2013-2023)**

| State | 2013 | 2014 | 2015 | 2016 | 2017 | 2018 | 2019 | 2020 | 2021 | 2022 | 2023 |
| --- | --- | --- | --- | --- | --- | --- | --- | --- | --- | --- | --- |
| INDIA | **7.33 (7.26-7.4)** | **6.95 (6.89-7.02)** | **6.79 (6.73-6.86)** | **6.69 (6.63-6.76)** | **6.44 (6.38-6.5)** | **6.61 (6.54-6.67)** | **6.4 (6.33-6.46)** | **6.79 (6.72-6.85)** | **6.79 (6.73-6.86)** | **7.2 (7.13-7.26)** | **6.91 (6.84-6.97)** |
| Andhra Pradesh | 10.99 (10.68-11.31) | 11.21 (10.89-11.53) | 10.92 (10.61-11.24) | 10.65 (10.35-10.96) | 8.77 (8.5-9.05) | 8.57 (8.3-8.84) | 8.49 (8.22-8.76) | 9.02 (8.74-9.3) | 9.36 (9.08-9.65) | 9.6 (9.31-9.89) | 9.44 (9.16-9.73) |
| Arunachal Pradesh | 8.46 (6.42-10.94) | 6.64 (4.86-8.86) | 6.57 (4.81-8.76) | 6.08 (4.4-8.19) | 4.19 (2.83-5.98) | 4.98 (3.49-6.9) | 4.24 (2.88-6.02) | 6.51 (4.8-8.63) | 6.57 (4.86-8.69) | 4.65 (3.24-6.47) | 6.45 (4.77-8.53) |
| Assam | 6.35 (5.96-6.76) | 6.53 (6.14-6.94) | 5.39 (5.04-5.77) | 6.13 (5.75-6.52) | 4.19 (3.88-4.51) | 4.22 (3.92-4.55) | 4.1 (3.8-4.42) | 5.32 (4.98-5.68) | 5.29 (4.95-5.65) | 5.82 (5.46-6.19) | 6.03 (5.67-6.4) |
| Bihar | 0.82 (0.74-0.9) | 0.56 (0.5-0.63) | 0.42 (0.36-0.47) | 0.38 (0.33-0.43) | 0.34 (0.29-0.39) | 0.32 (0.28-0.37) | 0.42 (0.37-0.48) | 0.61 (0.55-0.68) | 0.6 (0.54-0.67) | 0.52 (0.47-0.58) | 0.68 (0.62-0.75) |
| Chhattisgarh | 13.62 (13-14.27) | 14.4 (13.76-15.06) | 15.83 (15.17-16.52) | 15.45 (14.8-16.12) | 13.6 (12.99-14.23) | 14.63 (14.01-15.28) | 14.73 (14.11-15.37) | 15.45 (14.82-16.1) | 14.98 (14.36-15.62) | 15.37 (14.74-16.01) | 14.24 (13.64-14.86) |
| Delhi | 7.86 (7.27-8.5) | 8.04 (7.45-8.68) | 7.6 (7.03-8.21) | 7.74 (7.17-8.35) | 8.62 (8.02-9.26) | 8.24 (7.66-8.85) | 8.3 (7.73-8.91) | 9.49 (8.88-10.13) | 7.76 (7.21-8.34) | 8.76 (8.18-9.37) | 8.36 (7.8-8.95) |
| Goa | 13.4 (10.88-16.33) | 11.95 (9.58-14.73) | 11.05 (8.78-13.71) | 9.35 (7.29-11.82) | 10.88 (8.66-13.51) | 8.04 (6.15-10.33) | 7.6 (5.77-9.82) | 9.63 (7.56-12.09) | 9.31 (7.28-11.72) | 9 (7.02-11.38) | 9.98 (7.89-12.46) |
| Gujarat | 8.83 (8.5-9.18) | 8.67 (8.34-9.01) | 8.29 (7.97-8.61) | 8.63 (8.3-8.96) | 8.18 (7.87-8.51) | 8.09 (7.78-8.4) | 7.68 (7.38-7.99) | 7.75 (7.45-8.06) | 7.8 (7.5-8.1) | 8.16 (7.86-8.47) | 7.9 (7.6-8.2) |
| Haryana | 6.63 (6.19-7.11) | 5.46 (5.06-5.88) | 5.84 (5.43-6.28) | 5.89 (5.48-6.33) | 5.54 (5.15-5.96) | 5.76 (5.36-6.19) | 6.63 (6.21-7.08) | 6.71 (6.28-7.16) | 5.93 (5.53-6.35) | 5.04 (4.68-5.43) | 5.04 (4.68-5.43) |
| Himachal Pradesh | 5.52 (4.76-6.36) | 7.14 (6.28-8.09) | 5.6 (4.84-6.44) | 6.43 (5.62-7.32) | 6.75 (5.93-7.67) | 6.91 (6.07-7.82) | 5.75 (4.99-6.59) | 8.17 (7.26-9.16) | 7.54 (6.68-8.49) | 4.72 (4.04-5.48) | 7.36 (6.51-8.29) |
| Jammu & Kashmir | 2.22 (1.86-2.63) | 1.77 (1.45-2.13) | 2.75 (2.35-3.2) | 2.13 (1.78-2.52) | 2.19 (1.84-2.59) | 2.75 (2.36-3.19) | 1.98 (1.65-2.36) | 2.04 (1.71-2.42) | 1.59 (1.3-1.93) | 2.11 (1.78-2.5) | 2.32 (1.97-2.72) |
| Jharkhand | 2.86 (2.61-3.13) | 2.42 (2.19-2.67) | 1.56 (1.38-1.76) | 2.4 (2.17-2.64) | 1.84 (1.64-2.05) | 2.27 (2.05-2.5) | 3.18 (2.92-3.44) | 4.1 (3.81-4.4) | 2.48 (2.26-2.72) | 3.72 (3.45-4) | 3.46 (3.2-3.73) |
| Karnataka | 11.49 (11.11-11.87) | 10.49 (10.13-10.86) | 10.62 (10.26-10.99) | 9.63 (9.29-9.98) | 9.87 (9.53-10.23) | 9.76 (9.43-10.11) | 8.86 (8.53-9.19) | 9.38 (9.05-9.72) | 9.49 (9.16-9.83) | 9.78 (9.45-10.12) | 9.26 (8.94-9.6) |
| Kerala | 11.03 (10.55-11.53) | 11.46 (10.97-11.97) | 10.43 (9.96-10.91) | 9.84 (9.38-10.31) | 9.8 (9.35-10.26) | 10.3 (9.84-10.78) | 10.33 (9.87-10.81) | 10.51 (10.05-10.99) | 11.14 (10.66-11.63) | 11.49 (11.01-11.99) | 11.61 (11.13-12.11) |
| Madhya Pradesh | 10.42 (10.09-10.75) | 10.03 (9.71-10.36) | 10.67 (10.34-11.01) | 10.96 (10.63-11.3) | 11.26 (10.92-11.6) | 11.09 (10.76-11.42) | 10.93 (10.6-11.26) | 12.18 (11.84-12.52) | 11.64 (11.31-11.97) | 11.63 (11.3-11.96) | 11.28 (10.96-11.61) |
| Maharashtra | 8.55 (8.3-8.79) | 8 (7.77-8.24) | 7.63 (7.41-7.86) | 7.55 (7.33-7.78) | 7.63 (7.41-7.86) | 7.69 (7.47-7.92) | 7.58 (7.35-7.8) | 7.55 (7.33-7.77) | 7.89 (7.66-8.12) | 7.6 (7.38-7.82) | 7.18 (6.97-7.4) |
| Manipur | 1.03 (0.57-1.7) | 1.29 (0.78-2.02) | 1.08 (0.61-1.75) | 1.06 (0.61-1.73) | 1.05 (0.6-1.71) | 1.11 (0.64-1.78) | 1.42 (0.89-2.15) | 1.08 (0.63-1.74) | 0.69 (0.34-1.24) | 0.62 (0.3-1.15) | 0.49 (0.21-0.98) |
| Meghalaya | 2.71 (1.95-3.68) | 1.57 (1-2.34) | 2.66 (1.9-3.6) | 2.69 (1.94-3.64) | 2.28 (1.6-3.16) | 2.38 (1.69-3.28) | 2.05 (1.41-2.88) | 3.75 (2.87-4.82) | 3.29 (2.47-4.29) | 2.96 (2.19-3.91) | 2.69 (1.96-3.6) |
| Mizoram | 2.88 (1.65-4.69) | 2.85 (1.63-4.63) | 3.88 (2.43-5.88) | 4.19 (2.68-6.24) | 2.59 (1.45-4.28) | 2.05 (1.06-3.58) | 2.71 (1.55-4.4) | 3.35 (2.04-5.18) | 1.49 (0.68-2.83) | 2.96 (1.75-4.67) | 1.95 (1-3.41) |
| Nagaland | 1.23 (0.63-2.14) | 0.4 (0.11-1.03) | 0.5 (0.16-1.17) | 1.29 (0.68-2.2) | 0.78 (0.33-1.54) | 0.58 (0.21-1.27) | 0.48 (0.15-1.12) | 1.14 (0.59-1.99) | 0.56 (0.2-1.23) | 0.93 (0.44-1.71) | 0.74 (0.31-1.45) |
| Odisha | 9.35 (8.94-9.77) | 8.56 (8.18-8.97) | 7.93 (7.56-8.31) | 7.04 (6.69-7.4) | 10.56 (10.13-10.99) | 10.31 (9.89-10.74) | 8.89 (8.5-9.29) | 7.27 (6.92-7.63) | 5.45 (5.16-5.77) | 17.46 (16.92-18.01) | 10.16 (9.75-10.58) |
| Punjab | 1.93 (1.7-2.18) | 1.72 (1.5-1.95) | 1.7 (1.49-1.94) | 2.12 (1.88-2.38) | 2.35 (2.1-2.61) | 2.55 (2.29-2.82) | 3.8 (3.49-4.14) | 4.36 (4.02-4.72) | 3.99 (3.67-4.33) | 3.52 (3.22-3.84) | 3.58 (3.28-3.9) |
| Rajasthan | 4.34 (4.12-4.56) | 3.52 (3.32-3.72) | 2.6 (2.43-2.77) | 3.03 (2.85-3.22) | 2.91 (2.74-3.1) | 3.36 (3.18-3.56) | 3.28 (3.09-3.46) | 4.29 (4.08-4.5) | 3.98 (3.79-4.19) | 3.63 (3.45-3.83) | 3.68 (3.49-3.88) |
| Sikkim | 20.06 (15.27-25.88) | 27.94 (22.25-34.64) | 23.66 (18.48-29.85) | 25.98 (20.57-32.38) | 17.26 (12.93-22.58) | 18.06 (13.64-23.45) | 18.53 (14.07-23.95) | 21.51 (16.71-27.28) | 20.62 (15.95-26.24) | 20.74 (16.07-26.34) | 25.15 (20-31.22) |
| Tamil Nadu | 14.83 (14.44-15.23) | 14.01 (13.63-14.4) | 13.61 (13.23-13.99) | 13.26 (12.89-13.63) | 12.19 (11.84-12.55) | 12.51 (12.16-12.87) | 11.22 (10.89-11.56) | 13.86 (13.49-14.24) | 14.97 (14.58-15.36) | 14.59 (14.21-14.98) | 14.03 (13.66-14.41) |
| Tripura | 17.66 (15.79-19.69) | 14.51 (12.83-16.35) | 14.41 (12.74-16.23) | 11.73 (10.24-13.38) | 12.39 (10.87-14.07) | 11.7 (10.22-13.32) | 11.83 (10.36-13.46) | 12.57 (11.06-14.23) | 11.4 (9.96-12.97) | 10.34 (8.99-11.84) | 8.33 (7.13-9.68) |
| Union Territories | 16.03 (14.15-18.09) | 15.95 (14.09-17.98) | 16.93 (15.04-19) | 13.03 (11.4-14.83) | 13.04 (11.43-14.82) | 14.3 (12.62-16.13) | 14.48 (12.82-16.31) | 12.97 (11.42-14.68) | 12.62 (11.1-14.29) | 12.41 (10.92-14.04) | 12.63 (11.15-14.26) |
| Uttar Pradesh | 2.15 (2.06-2.24) | 1.48 (1.4-1.56) | 1.58 (1.5-1.66) | 1.43 (1.36-1.51) | 1.78 (1.7-1.87) | 1.84 (1.76-1.92) | 2.07 (1.98-2.16) | 1.5 (1.43-1.57) | 2.15 (2.06-2.24) | 2.64 (2.54-2.73) | 3.04 (2.94-3.14) |
| Uttarakhand | 2.38 (1.97-2.85) | 1.09 (0.82-1.41) | 2.48 (2.07-2.94) | 1 (0.75-1.31) | 2.27 (1.88-2.71) | 3.19 (2.73-3.71) | 3.32 (2.86-3.84) | 5.01 (4.44-5.64) | 4.56 (4.02-5.16) | 4.91 (4.35-5.52) | 5.97 (5.35-6.64) |
| West Bengal | 11.48 (11.17-11.79) | 11.88 (11.56-12.2) | 12.02 (11.71-12.34) | 12.18 (11.87-12.5) | 10.2 (9.91-10.49) | 11.52 (11.22-11.83) | 10.33 (10.04-10.62) | 10.76 (10.47-11.06) | 10.84 (10.55-11.14) | 9.61 (9.34-9.89) | 9.96 (9.68-10.25) |

**Web Appendix 5: Crude suicide rates with 95% CI by sex and SDI state groups: India (2013-2023)**

| Low SDI |  |  |  |  |  |  |  |  |  |  |  |
| --- | --- | --- | --- | --- | --- | --- | --- | --- | --- | --- | --- |
|  | **2013** | **2014** | **2015** | **2016** | **2017** | **2018** | **2019** | **2020** | **2021** | **2022** | **2023** |
| Total | 6.1 (6.04-6.16) | 5.37 (5.31-5.43) | 5.44 (5.39-5.5) | 5.29 (5.23-5.35) | 5.49 (5.44-5.55) | 5.74 (5.68-5.8) | 6.06 (6-6.12) | 6.77 (6.71-6.84) | 6.9 (6.83-6.96) | 7.39 (7.32-7.45) | 7.38 (7.32-7.45) |
| Male | 7.56 (7.46-7.66) | 6.58 (6.49-6.67) | 6.83 (6.74-6.92) | 6.5 (6.41-6.59) | 6.75 (6.66-6.84) | 7.13 (7.03-7.22) | 7.74 (7.65-7.84) | 8.98 (8.88-9.08) | 9.35 (9.25-9.45) | 9.3 (9.2-9.4) | 9.71 (9.6-9.81) |
| Female | 4.54 (4.46-4.62) | 4.07 (4-4.15) | 3.96 (3.89-4.03) | 3.99 (3.92-4.06) | 4.16 (4.08-4.23) | 4.26 (4.18-4.33) | 4.27 (4.2-4.34) | 4.42 (4.35-4.5) | 4.29 (4.22-4.37) | 5.36 (5.28-5.44) | 4.92 (4.84-4.99) |
|  |  |  |  |  |  |  |  |  |  |  |  |
| Middle SDI |  |  |  |  |  |  |  |  |  |  |  |
|  | **2013** | **2014** | **2015** | **2016** | **2017** | **2018** | **2019** | **2020** | **2021** | **2022** | **2023** |
| Total | 14.45 (14.32-14.57) | 14.76 (14.64-14.89) | 14.97 (14.84-15.09) | 14.25 (14.13-14.37) | 13.27 (13.15-13.38) | 13.68 (13.56-13.8) | 13.71 (13.6-13.83) | 14.33 (14.21-14.45) | 15.43 (15.31-15.56) | 15.49 (15.37-15.62) | 15.31 (15.19-15.44) |
| Male | 18.56 (18.36-18.76) | 19.37 (19.16-19.57) | 19.78 (19.57-19.98) | 18.57 (18.37-18.76) | 17.64 (17.45-17.83) | 18.17 (17.98-18.36) | 18.75 (18.55-18.94) | 19.59 (19.39-19.78) | 21.7 (21.5-21.91) | 22.03 (21.82-22.24) | 21.78 (21.57-21.99) |
| Female | 10.12 (9.97-10.27) | 9.92 (9.77-10.07) | 9.91 (9.76-10.06) | 9.71 (9.57-9.86) | 8.67 (8.53-8.81) | 8.96 (8.82-9.1) | 8.43 (8.29-8.56) | 8.81 (8.67-8.94) | 8.84 (8.71-8.98) | 8.62 (8.49-8.76) | 8.52 (8.39-8.66) |
|  |  |  |  |  |  |  |  |  |  |  |  |
| High SDI |  |  |  |  |  |  |  |  |  |  |  |
|  | **2013** | **2014** | **2015** | **2016** | **2017** | **2018** | **2019** | **2020** | **2021** | **2022** | **2023** |
| Total | 16.12 (15.97-16.26) | 15.64 (15.5-15.78) | 15.39 (15.25-15.54) | 15.21 (15.07-15.35) | 15.18 (15.04-15.32) | 15.26 (15.12-15.4) | 15.6 (15.46-15.74) | 17.38 (17.23-17.52) | 18.8 (18.64-18.95) | 19.43 (19.27-19.58) | 19.36 (19.21-19.52) |
| Male | 22.38 (22.14-22.62) | 21.81 (21.58-22.05) | 21.71 (21.47-21.94) | 21.56 (21.33-21.79) | 21.62 (21.39-21.86) | 21.61 (21.38-21.84) | 22.51 (22.28-22.75) | 25.12 (24.87-25.36) | 27.61 (27.36-27.87) | 29.03 (28.77-29.3) | 29.1 (28.84-29.36) |
| Female | 9.57 (9.41-9.73) | 9.18 (9.03-9.34) | 8.79 (8.64-8.95) | 8.57 (8.42-8.72) | 8.43 (8.28-8.58) | 8.62 (8.47-8.77) | 8.35 (8.21-8.5) | 9.27 (9.11-9.42) | 9.55 (9.4-9.71) | 9.35 (9.2-9.5) | 9.15 (9-9.3) |

**Web Appendix 6: Suicide rate ratios for 2018 versus 2017, 2019 versus 2017, and 2020 versus 2017, with 95% UI by sex**

|  |  | TOTAL |  |  | MALE |  |  | FEMALE |  |
| --- | --- | --- | --- | --- | --- | --- | --- | --- | --- |
| State | **RR 95%UI (2018÷2017)** | **RR 95%UI (2019÷2017)** | **RR 95%UI (2020÷2017)** | **RR 95%UI (2018÷2017)** | **RR 95%UI (2019÷2017)** | **RR 95%UI (2020÷2017)** | **RR 95%UI (2018÷2017)** | **RR 95%UI (2019÷2017)** | **RR 95%UI (2020÷2017)** |
| INDIA | **1.02 (1.01-1.03)** | **1.04 (1.04-1.05)** | **1.14 (1.13-1.15)** | **1.02 (1.01-1.03)** | **1.07 (1.06-1.08)** | **1.18 (1.17-1.19)** | **1.02 (1.01-1.04)** | **0.99 (0.97-1)** | **1.05 (1.03-1.06)** |
| Andhra Pradesh | 1 (0.98-1.03) | 1.07 (1.04-1.1) | 1.14 (1.11-1.17) | 1.02 (0.99-1.05) | 1.12 (1.09-1.15) | 1.19 (1.15-1.22) | 0.97 (0.93-1.02) | 0.96 (0.92-1.01) | 1.02 (0.98-1.07) |
| Arunachal Pradesh | 1.46 (1.09-1.93) | 1.23 (0.93-1.6) | 1.74 (1.33-2.27) | 1.61 (1.14-2.23) | 1.34 (0.92-1.9) | 1.84 (1.29-2.53) | 1.18 (0.66-1.89) | 1.01 (0.57-1.68) | 1.55 (0.93-2.42) |
| Assam | 1.03 (0.97-1.09) | 1.01 (0.96-1.08) | 1.37 (1.3-1.45) | 1.04 (0.97-1.11) | 1.03 (0.96-1.1) | 1.42 (1.33-1.51) | 1 (0.91-1.12) | 0.98 (0.87-1.08) | 1.27 (1.15-1.4) |
| Bihar | 1.12 (0.97-1.28) | 1.6 (1.41-1.8) | 1.99 (1.74-2.25) | 1.29 (1.07-1.57) | 1.95 (1.63-2.33) | 2.2 (1.83-2.61) | 0.94 (0.77-1.17) | 1.24 (1.02-1.51) | 1.78 (1.48-2.11) |
| Chhattisgarh | 1.1 (1.06-1.14) | 1.17 (1.13-1.21) | 1.17 (1.13-1.21) | 1.11 (1.06-1.15) | 1.21 (1.16-1.26) | 1.18 (1.14-1.23) | 1.07 (1-1.14) | 1.08 (1.01-1.15) | 1.13 (1.06-1.2) |
| Delhi | 1 (0.95-1.06) | 0.98 (0.93-1.04) | 1.2 (1.14-1.27) | 1.03 (0.96-1.09) | 0.99 (0.93-1.06) | 1.25 (1.18-1.33) | 0.95 (0.86-1.05) | 0.96 (0.86-1.06) | 1.1 (1-1.21) |
| Goa | 0.93 (0.76-1.09) | 0.93 (0.79-1.1) | 1.1 (0.93-1.3) | 1.01 (0.82-1.23) | 1.04 (0.83-1.25) | 1.2 (0.98-1.45) | 0.73 (0.51-1.02) | 0.69 (0.49-0.93) | 0.88 (0.63-1.17) |
| Gujarat | 1.03 (1-1.06) | 1 (0.97-1.03) | 1.04 (1-1.07) | 1.06 (1.01-1.1) | 1.03 (0.99-1.08) | 1.09 (1.04-1.13) | 0.98 (0.93-1.04) | 0.93 (0.88-0.99) | 0.94 (0.89-1) |
| Haryana | 1.03 (0.98-1.08) | 1.2 (1.14-1.25) | 1.13 (1.08-1.18) | 1.03 (0.97-1.08) | 1.2 (1.14-1.26) | 1.11 (1.05-1.17) | 1.03 (0.93-1.14) | 1.19 (1.09-1.31) | 1.2 (1.09-1.32) |
| Himachal Pradesh | 1.27 (1.13-1.42) | 1 (0.88-1.11) | 1.45 (1.3-1.61) | 1.45 (1.25-1.67) | 1.1 (0.95-1.28) | 1.63 (1.42-1.86) | 1.02 (0.85-1.22) | 0.85 (0.71-1.01) | 1.2 (1.02-1.42) |
| Jammu & Kashmir | 1.14 (0.95-1.33) | 0.97 (0.82-1.14) | 1.01 (0.86-1.18) | 1.03 (0.81-1.28) | 1.03 (0.82-1.27) | 1.09 (0.85-1.36) | 1.25 (0.99-1.58) | 0.9 (0.71-1.14) | 0.93 (0.72-1.18) |
| Jharkhand | 1.06 (0.99-1.15) | 1.31 (1.22-1.42) | 1.69 (1.56-1.81) | 1 (0.91-1.1) | 1.16 (1.06-1.27) | 1.49 (1.37-1.62) | 1.23 (1.07-1.43) | 1.72 (1.5-1.98) | 2.22 (1.92-2.54) |
| Karnataka | 0.97 (0.95-1) | 0.94 (0.92-0.97) | 1.02 (0.99-1.04) | 0.97 (0.94-1) | 0.96 (0.93-0.99) | 1.04 (1.01-1.07) | 0.98 (0.93-1.03) | 0.89 (0.85-0.94) | 0.95 (0.9-1) |
| Kerala | 1.04 (1.01-1.07) | 1.07 (1.04-1.1) | 1.06 (1.03-1.09) | 1.03 (0.99-1.07) | 1.08 (1.04-1.12) | 1.06 (1.02-1.09) | 1.05 (0.98-1.12) | 1.05 (0.98-1.12) | 1.07 (1-1.14) |
| Madhya Pradesh | 0.98 (0.96-1.01) | 1.02 (1-1.05) | 1.18 (1.15-1.21) | 0.98 (0.95-1.02) | 1.06 (1.03-1.09) | 1.25 (1.21-1.28) | 0.98 (0.94-1.02) | 0.97 (0.93-1.01) | 1.08 (1.03-1.12) |
| Maharashtra | 1 (0.98-1.03) | 1.05 (1.03-1.07) | 1.09 (1.07-1.11) | 1 (0.98-1.03) | 1.07 (1.04-1.09) | 1.13 (1.1-1.15) | 1 (0.96-1.05) | 0.99 (0.95-1.03) | 0.98 (0.94-1.03) |
| Manipur | 1.19 (0.76-1.76) | 1.32 (0.86-1.94) | 0.99 (0.62-1.5) | 1.28 (0.77-2.09) | 1.3 (0.75-2.08) | 0.97 (0.52-1.59) | 1.05 (0.47-2.07) | 1.34 (0.65-2.47) | 1.02 (0.46-2.05) |
| Meghalaya | 1.13 (0.92-1.4) | 1.17 (0.95-1.42) | 1.31 (1.06-1.61) | 1.15 (0.9-1.45) | 1.25 (0.98-1.53) | 1.22 (0.95-1.53) | 1.04 (0.65-1.62) | 0.89 (0.53-1.45) | 1.64 (1.06-2.51) |
| Mizoram | 0.85 (0.62-1.14) | 0.75 (0.53-1.01) | 1.15 (0.86-1.54) | 0.87 (0.6-1.19) | 0.69 (0.48-0.98) | 1.12 (0.81-1.51) | 0.79 (0.3-1.67) | 1.04 (0.44-2.07) | 1.29 (0.6-2.47) |
| Nagaland | 1.08 (0.63-1.73) | 1.21 (0.72-1.9) | 1.41 (0.87-2.1) | 1.18 (0.64-1.93) | 1.41 (0.78-2.29) | 1.4 (0.79-2.33) | 0.74 (0.18-2.25) | 0.61 (0.12-1.83) | 1.45 (0.48-3.57) |
| Odisha | 1.01 (0.97-1.06) | 1.01 (0.97-1.05) | 1.21 (1.17-1.26) | 1.06 (1-1.12) | 1.19 (1.12-1.26) | 1.79 (1.71-1.89) | 0.97 (0.92-1.03) | 0.84 (0.79-0.89) | 0.68 (0.64-0.73) |
| Punjab | 1.14 (1.07-1.23) | 1.56 (1.46-1.66) | 1.72 (1.61-1.83) | 1.16 (1.07-1.25) | 1.55 (1.44-1.67) | 1.68 (1.57-1.81) | 1.08 (0.92-1.26) | 1.62 (1.41-1.83) | 1.85 (1.61-2.11) |
| Rajasthan | 1.11 (1.06-1.16) | 1.14 (1.09-1.2) | 1.41 (1.36-1.47) | 1.09 (1.04-1.16) | 1.16 (1.1-1.22) | 1.39 (1.33-1.46) | 1.15 (1.06-1.24) | 1.12 (1.03-1.21) | 1.46 (1.35-1.59) |
| Sikkim | 0.91 (0.74-1.09) | 1 (0.81-1.21) | 1.29 (1.05-1.53) | 0.88 (0.68-1.08) | 0.98 (0.77-1.22) | 1.3 (1.07-1.59) | 1.04 (0.71-1.53) | 1.07 (0.73-1.51) | 1.24 (0.83-1.79) |
| Tamil Nadu | 0.95 (0.93-0.97) | 0.92 (0.9-0.94) | 1.15 (1.12-1.17) | 0.92 (0.89-0.95) | 0.92 (0.89-0.95) | 1.15 (1.12-1.19) | 1.02 (0.98-1.06) | 0.92 (0.88-0.95) | 1.13 (1.09-1.18) |
| Tripura | 1.03 (0.92-1.15) | 1.03 (0.92-1.15) | 1.18 (1.06-1.29) | 1.07 (0.94-1.21) | 1.07 (0.94-1.22) | 1.27 (1.12-1.42) | 0.94 (0.79-1.11) | 0.95 (0.79-1.14) | 1.01 (0.84-1.21) |
| Union Territories | 0.98 (0.89-1.07) | 0.94 (0.86-1.03) | 0.84 (0.77-0.92) | 0.94 (0.85-1.04) | 0.88 (0.78-0.97) | 0.79 (0.71-0.88) | 1.09 (0.9-1.3) | 1.11 (0.92-1.33) | 0.99 (0.82-1.2) |
| Uttar Pradesh | 1.08 (1.03-1.12) | 1.2 (1.15-1.25) | 1.04 (1-1.08) | 1.11 (1.05-1.18) | 1.23 (1.16-1.29) | 1.19 (1.13-1.24) | 1.03 (0.97-1.09) | 1.15 (1.09-1.23) | 0.84 (0.78-0.89) |
| Uttarakhand | 1.25 (1.09-1.45) | 1.52 (1.31-1.75) | 2.75 (2.41-3.1) | 1.17 (0.96-1.38) | 1.55 (1.3-1.84) | 3.06 (2.6-3.56) | 1.4 (1.1-1.75) | 1.46 (1.14-1.82) | 2.2 (1.78-2.75) |
| West Bengal | 1.09 (1.06-1.12) | 1.04 (1.01-1.06) | 1.07 (1.04-1.09) | 1.07 (1.03-1.1) | 1.06 (1.02-1.09) | 1.08 (1.04-1.11) | 1.12 (1.08-1.17) | 1.01 (0.97-1.05) | 1.05 (1.01-1.09) |

**Web Appendix 7: Suicide rate ratios for 2021 versus 2017, 2022 versus 2017, and 2023 versus 2017, with 95% UI by sex**

|  |  | TOTAL |  |  | MALE |  |  | FEMALE |  |
| --- | --- | --- | --- | --- | --- | --- | --- | --- | --- |
| State | **RR 95%UI (2021÷2017)** | **RR 95%UI (2022÷2017)** | **RR 95%UI (2023÷2017)** | **RR 95%UI (2021÷2017)** | **RR 95%UI (2022÷2017)** | **RR 95%UI (2023÷2017)** | **RR 95%UI (2021÷2017)** | **RR 95%UI (2022÷2017)** | **RR 95%UI (2023÷2017)** |
| INDIA | **1.21 (1.2-1.21)** | **1.24 (1.23-1.25)** | **1.24 (1.23-1.25)** | **1.28 (1.27-1.29)** | **1.31 (1.29-1.32)** | **1.32 (1.3-1.33)** | **1.05 (1.04-1.06)** | **1.11 (1.1-1.13)** | **1.07 (1.05-1.08)** |
| Andhra Pradesh | 1.37 (1.34-1.4) | 1.41 (1.38-1.44) | 1.43 (1.4-1.47) | 1.5 (1.46-1.54) | 1.55 (1.51-1.59) | 1.59 (1.54-1.63) | 1.06 (1.01-1.11) | 1.09 (1.04-1.14) | 1.07 (1.03-1.12) |
| Arunachal Pradesh | 1.72 (1.31-2.23) | 1.57 (1.21-2.1) | 1.33 (1.02-1.74) | 1.79 (1.28-2.43) | 1.79 (1.29-2.44) | 1.24 (0.89-1.74) | 1.54 (0.96-2.41) | 1.06 (0.65-1.75) | 1.5 (0.95-2.31) |
| Assam | 1.37 (1.3-1.44) | 1.38 (1.31-1.45) | 1.25 (1.18-1.32) | 1.41 (1.33-1.5) | 1.37 (1.29-1.47) | 1.18 (1.1-1.26) | 1.25 (1.14-1.38) | 1.38 (1.25-1.53) | 1.43 (1.3-1.57) |
| Bihar | 2 (1.76-2.25) | 1.67 (1.47-1.89) | 2.18 (1.94-2.44) | 2.25 (1.92-2.67) | 1.82 (1.52-2.18) | 2.38 (2-2.83) | 1.73 (1.46-2.09) | 1.52 (1.27-1.83) | 1.98 (1.68-2.33) |
| Chhattisgarh | 1.17 (1.13-1.21) | 1.25 (1.21-1.29) | 1.15 (1.11-1.19) | 1.2 (1.16-1.25) | 1.3 (1.25-1.36) | 1.2 (1.15-1.24) | 1.1 (1.03-1.16) | 1.13 (1.06-1.2) | 1.04 (0.98-1.11) |
| Delhi | 1.06 (1-1.12) | 1.26 (1.19-1.33) | 1.13 (1.07-1.19) | 1.14 (1.07-1.22) | 1.37 (1.29-1.46) | 1.21 (1.13-1.29) | 0.89 (0.8-0.98) | 1 (0.91-1.11) | 0.96 (0.87-1.06) |
| Goa | 1.13 (0.96-1.34) | 1.07 (0.9-1.24) | 1.15 (0.98-1.35) | 1.26 (1.05-1.52) | 1.17 (0.95-1.42) | 1.26 (1.04-1.53) | 0.84 (0.61-1.18) | 0.82 (0.58-1.14) | 0.9 (0.67-1.23) |
| Gujarat | 1.12 (1.08-1.15) | 1.13 (1.1-1.17) | 1.11 (1.08-1.15) | 1.2 (1.16-1.25) | 1.2 (1.16-1.25) | 1.19 (1.14-1.24) | 0.95 (0.9-1) | 0.99 (0.94-1.05) | 0.96 (0.91-1.02) |
| Haryana | 1.02 (0.98-1.07) | 1.04 (0.99-1.09) | 0.91 (0.86-0.96) | 1.02 (0.96-1.07) | 1.07 (1.01-1.14) | 0.91 (0.86-0.96) | 1.06 (0.96-1.18) | 0.9 (0.81-1) | 0.9 (0.81-1) |
| Himachal Pradesh | 1.5 (1.34-1.65) | 1.08 (0.96-1.2) | 1.36 (1.22-1.53) | 1.77 (1.54-2.02) | 1.35 (1.18-1.57) | 1.56 (1.37-1.8) | 1.11 (0.93-1.33) | 0.69 (0.56-0.85) | 1.08 (0.91-1.28) |
| Jammu & Kashmir | 0.86 (0.73-1.03) | 1.12 (0.96-1.32) | 1.28 (1.09-1.48) | 0.99 (0.79-1.26) | 1.26 (1.02-1.58) | 1.46 (1.19-1.8) | 0.72 (0.56-0.93) | 0.95 (0.76-1.2) | 1.04 (0.83-1.29) |
| Jharkhand | 1.41 (1.31-1.52) | 1.66 (1.56-1.8) | 1.52 (1.42-1.62) | 1.44 (1.32-1.57) | 1.54 (1.41-1.67) | 1.39 (1.27-1.52) | 1.34 (1.16-1.53) | 2.01 (1.76-2.32) | 1.88 (1.63-2.16) |
| Karnataka | 1.07 (1.05-1.1) | 1.11 (1.09-1.14) | 1.08 (1.06-1.11) | 1.12 (1.09-1.15) | 1.16 (1.13-1.19) | 1.14 (1.11-1.17) | 0.96 (0.91-1) | 0.98 (0.94-1.03) | 0.94 (0.89-0.98) |
| Kerala | 1.18 (1.15-1.22) | 1.25 (1.22-1.29) | 1.35 (1.31-1.39) | 1.2 (1.16-1.24) | 1.28 (1.24-1.32) | 1.4 (1.35-1.45) | 1.13 (1.07-1.21) | 1.17 (1.09-1.24) | 1.18 (1.1-1.26) |
| Madhya Pradesh | 1.2 (1.17-1.23) | 1.22 (1.19-1.25) | 1.22 (1.2-1.25) | 1.3 (1.26-1.34) | 1.33 (1.29-1.37) | 1.36 (1.32-1.4) | 1.03 (0.99-1.07) | 1.03 (0.99-1.07) | 1 (0.96-1.04) |
| Maharashtra | 1.21 (1.18-1.23) | 1.23 (1.2-1.25) | 1.21 (1.19-1.24) | 1.26 (1.24-1.29) | 1.3 (1.28-1.33) | 1.31 (1.28-1.33) | 1.03 (0.98-1.07) | 0.99 (0.95-1.03) | 0.93 (0.9-0.97) |
| Manipur | 1.06 (0.69-1.59) | 0.56 (0.34-0.94) | 0.52 (0.31-0.91) | 1.29 (0.76-2.12) | 0.53 (0.28-1) | 0.56 (0.31-1.02) | 0.61 (0.24-1.38) | 0.54 (0.22-1.19) | 0.42 (0.16-1.13) |
| Meghalaya | 1.3 (1.06-1.61) | 1.22 (0.98-1.5) | 1.24 (1.02-1.51) | 1.27 (1-1.63) | 1.2 (0.95-1.5) | 1.27 (1-1.59) | 1.42 (0.93-2.19) | 1.26 (0.81-1.88) | 1.14 (0.73-1.79) |
| Mizoram | 1.03 (0.79-1.37) | 1.57 (1.21-2.09) | 1 (0.75-1.37) | 1.13 (0.84-1.52) | 1.68 (1.26-2.26) | 1.06 (0.77-1.41) | 0.52 (0.21-1.31) | 1.05 (0.54-2.25) | 0.69 (0.3-1.52) |
| Nagaland | 1.22 (0.75-1.96) | 1.36 (0.89-2.09) | 0.97 (0.61-1.64) | 1.36 (0.78-2.29) | 1.42 (0.87-2.39) | 0.99 (0.58-1.81) | 0.58 (0.17-1.95) | 1.05 (0.35-2.92) | 0.81 (0.29-2.37) |
| Odisha | 1.23 (1.18-1.28) | 1.33 (1.28-1.39) | 1.3 (1.25-1.35) | 2.03 (1.92-2.13) | 0.98 (0.92-1.04) | 1.68 (1.6-1.77) | 0.51 (0.48-0.55) | 1.65 (1.56-1.73) | 0.96 (0.9-1.02) |
| Punjab | 1.69 (1.59-1.81) | 1.58 (1.49-1.7) | 1.48 (1.38-1.57) | 1.7 (1.58-1.84) | 1.61 (1.5-1.73) | 1.47 (1.36-1.58) | 1.69 (1.46-1.93) | 1.49 (1.3-1.73) | 1.52 (1.33-1.73) |
| Rajasthan | 1.38 (1.32-1.44) | 1.3 (1.25-1.36) | 1.34 (1.29-1.39) | 1.39 (1.33-1.46) | 1.33 (1.26-1.39) | 1.37 (1.31-1.45) | 1.36 (1.25-1.47) | 1.24 (1.15-1.34) | 1.26 (1.16-1.37) |
| Sikkim | 1.19 (0.99-1.43) | 1.28 (1.08-1.54) | 1.21 (1.01-1.46) | 1.18 (0.95-1.47) | 1.33 (1.09-1.65) | 1.14 (0.93-1.42) | 1.14 (0.8-1.68) | 1.19 (0.83-1.7) | 1.42 (1.01-2.03) |
| Tamil Nadu | 1.28 (1.25-1.31) | 1.34 (1.31-1.36) | 1.31 (1.28-1.34) | 1.31 (1.27-1.34) | 1.41 (1.37-1.44) | 1.39 (1.35-1.42) | 1.22 (1.18-1.27) | 1.19 (1.15-1.24) | 1.15 (1.1-1.19) |
| Tripura | 1.06 (0.96-1.19) | 0.97 (0.87-1.08) | 0.87 (0.78-0.98) | 1.14 (1.01-1.29) | 1.05 (0.93-1.2) | 0.98 (0.86-1.11) | 0.92 (0.77-1.11) | 0.83 (0.67-1) | 0.66 (0.54-0.82) |
| Union Territories | 0.9 (0.82-0.99) | 0.9 (0.83-0.98) | 0.9 (0.82-0.98) | 0.87 (0.79-0.97) | 0.87 (0.8-0.97) | 0.87 (0.78-0.96) | 0.96 (0.8-1.15) | 0.94 (0.79-1.14) | 0.96 (0.8-1.15) |
| Uttar Pradesh | 1.26 (1.22-1.32) | 1.73 (1.67-1.79) | 1.92 (1.85-1.99) | 1.31 (1.25-1.38) | 1.92 (1.83-2.02) | 2.08 (1.98-2.18) | 1.2 (1.14-1.27) | 1.47 (1.39-1.56) | 1.7 (1.61-1.81) |
| Uttarakhand | 2.06 (1.81-2.36) | 2.3 (2.03-2.63) | 2.64 (2.32-2.97) | 2.09 (1.77-2.47) | 2.41 (2.06-2.84) | 2.65 (2.27-3.07) | 1.99 (1.58-2.47) | 2.14 (1.7-2.67) | 2.61 (2.09-3.21) |
| West Bengal | 1.09 (1.07-1.12) | 1.02 (0.99-1.04) | 1.03 (1-1.05) | 1.11 (1.08-1.15) | 1.07 (1.04-1.11) | 1.06 (1.03-1.1) | 1.06 (1.02-1.1) | 0.94 (0.9-0.98) | 0.97 (0.93-1.01) |

**Web Appendix 8: Crude suicide rates with 95% CI by sex and age-group: India (2019-2023)**

|  |  |  | MALE |  |  |
| --- | --- | --- | --- | --- | --- |
| Year | 0 to 17 years | 18 to 29 years | 30 to 44 years | 45 to 59 years | 60 years and above |
| 2019 | 2.03 (1.97–2.09) | 20.47 (20.24–20.70) | 22.56 (22.32–22.80) | 20.01 (19.74–20.29) | 12.63 (12.36–12.90) |
| 2020 | 2.46 (2.39–2.53) | 22.75 (22.51–22.99) | 24.33 (24.08–24.58) | 21.35 (21.07–21.64) | 14.79 (14.50–15.09) |
| 2021 | 2.29 (2.23–2.35) | 24.67 (24.43–24.92) | 26.65 (26.39–26.91) | 23.42 (23.13–23.71) | 16.38 (16.08–16.69) |
| 2022 | 2.07 (2.01–2.13) | 24.66 (24.42–24.91) | 27.47 (27.21–27.73) | 24.69 (24.39–24.99) | 17.30 (16.99–17.62) |
| 2023 | 2.20 (2.14–2.26) | 24.29 (24.05–24.54) | 27.90 (27.64–28.16) | 24.93 (24.63–25.23) | 17.73 (17.42–18.05) |
|  |  |  |  |  |  |
|  |  |  | **FEMALE** |  |  |
| Year | 0 to 17 years | 18 to 29 years | 30 to 44 years | 45 to 59 years | 60 years and above |
| 2019 | 2.71 (2.63–2.78) | 12.57 (12.39–12.76) | 7.51 (7.37–7.66) | 4.86 (4.72–5.00) | 3.91 (3.76–4.06) |
| 2020 | 3.09 (3.01–3.16) | 12.54 (12.35–12.72) | 7.92 (7.77–8.06) | 5.57 (5.42–5.71) | 4.71 (4.55–4.87) |
| 2021 | 2.87 (2.80–2.95) | 12.76 (12.57–12.94) | 7.94 (7.80–8.09) | 5.46 (5.32–5.61) | 5.00 (4.84–5.17) |
| 2022 | 2.81 (2.74–2.89) | 14.16 (13.97–14.35) | 8.33 (8.19–8.48) | 5.61 (5.46–5.75) | 5.07 (4.91–5.24) |
| 2023 | 2.90 (2.83–2.98) | 12.21 (12.03–12.39) | 8.49 (8.34–8.64) | 6.07 (5.92–6.22) | 5.10 (4.93–5.26) |
